# Supplementary material for: Fast Li+ diffusion in interlayer-expanded vanadium disulfide nanosheets for Li+/Mg2+ hybrid-ion batteries
Source: Royal Society of Chemistry journal article supplement (doi:10.1039/c8ta00418h), 2018-01-01
Supplement: c8ta00418h1.pdf [file c8ta00418h1.pdf]

## Supporting Information

### **Fast Li<sup>+</sup> Diffusion in Interlayer-Expanded Vanadium Disulfide Nanosheets for Li<sup>+</sup>/Mg<sup>2+</sup> Hybrid-Ion Batteries**

*Yuan Meng <sup>a</sup>, Yingying Zhao <sup>a</sup>, Dashuai Wang <sup>a</sup>, Di Yang <sup>a</sup>, Yu Gao <sup>a</sup>, Ruqian Lian <sup>a</sup>,  
Gang Chen <sup>a,b</sup>, Yingjin Wei <sup>a,\*</sup>*

<sup>a</sup>Key Laboratory of Physics and Technology for Advanced Batteries (Ministry of Education), College of Physics, Jilin University, Changchun 130012, P. R. China.

<sup>b</sup>State Key Laboratory of Superhard Materials, College of Physics, Jilin University, Changchun 130012, P. R. China.

\*Corresponding author email: [yjwei@jlu.edu.cn](mailto:yjwei@jlu.edu.cn) (Y. Wei); Tel: 86-431-85155126.

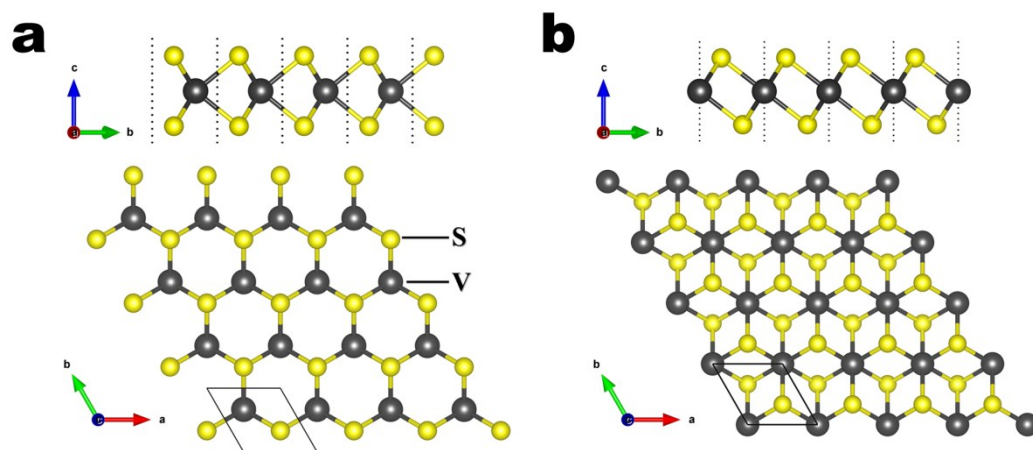

**Fig. S1** Schematic of the crystal structure of (a) hexagonal VS<sub>2</sub>, and (b) trigonal VS<sub>2</sub>.

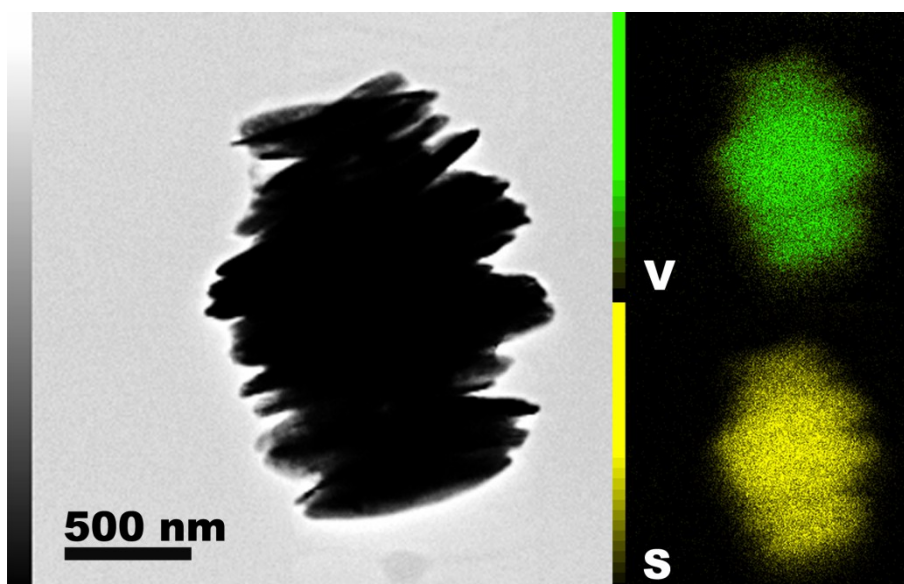

**Fig. S2** V and S elemental mappings of the VS<sub>2</sub> nanosheets.

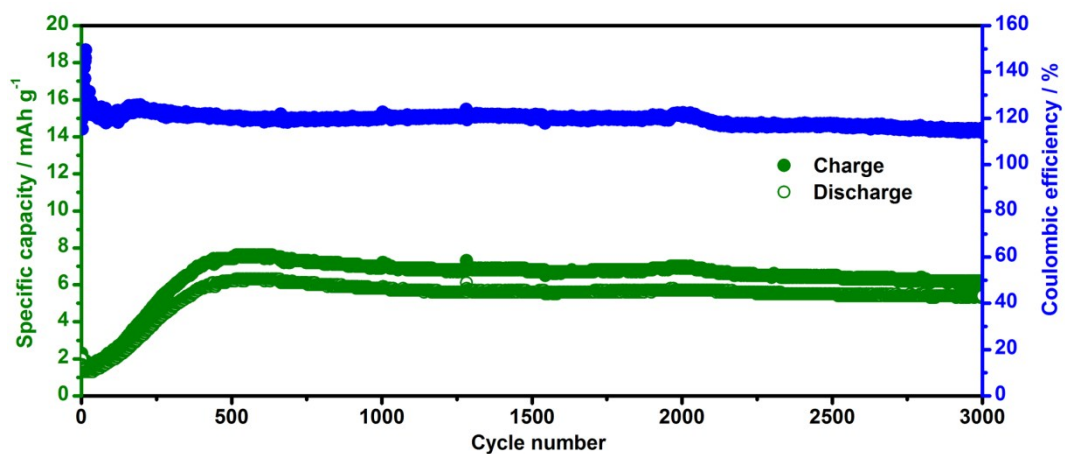

**Fig. S3** Cycling performance of the VS<sub>2</sub> nanosheets in MRB at the current density of 50 mA·g<sup>-1</sup>.

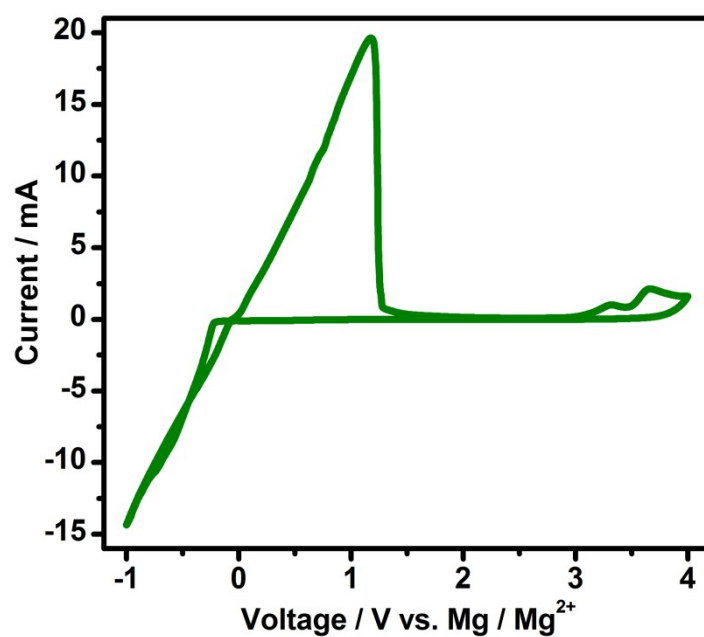

**Fig. S4** CV curve of a three-electrode cell, using the APC+LiCl/THF hybrid electrolyte, stainless steel foil as the working electrode, and Mg foil as the reference and counter electrodes.

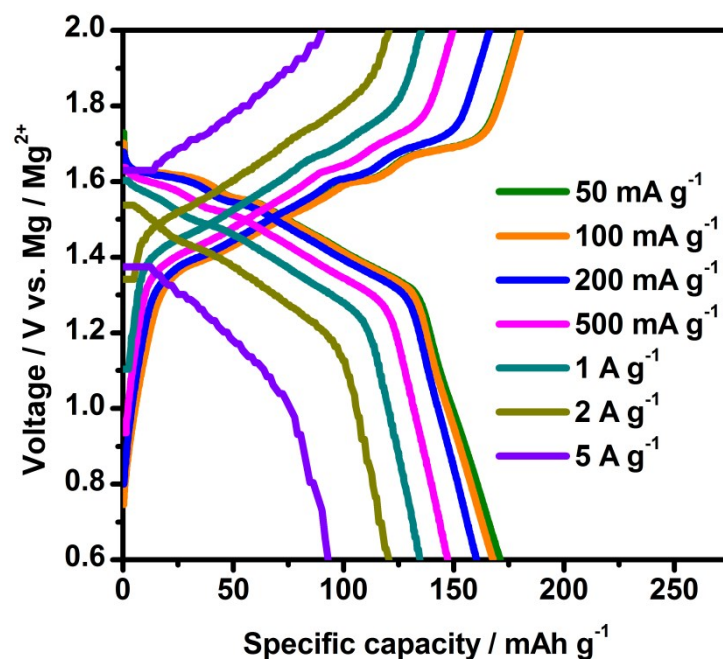

**Fig. S5** Charge-discharge curves of the VS<sub>2</sub> nanosheets at different current densities in LMIB.

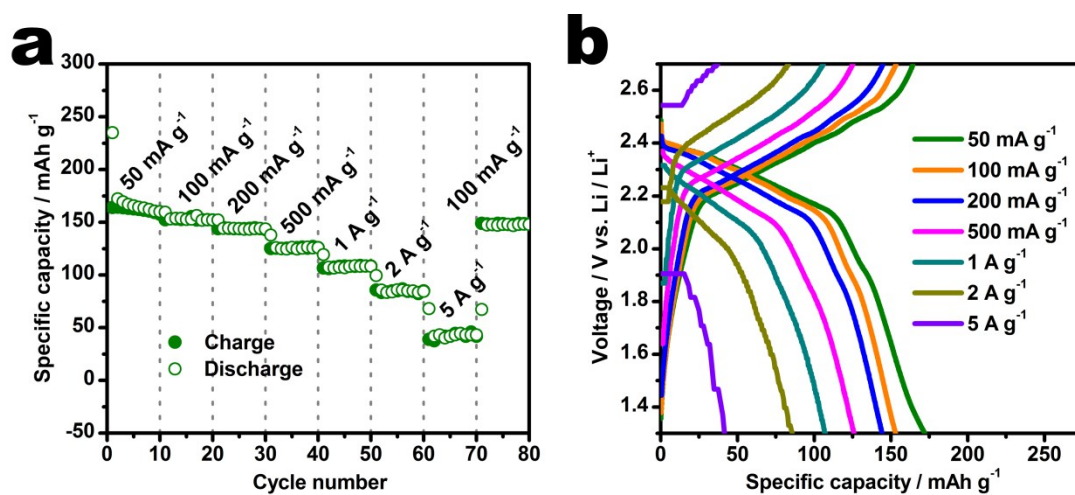

**Fig. S6** (a) Rate capability and (b) charge-discharge curves at different current densities of the VS<sub>2</sub> nanosheets in LIB.

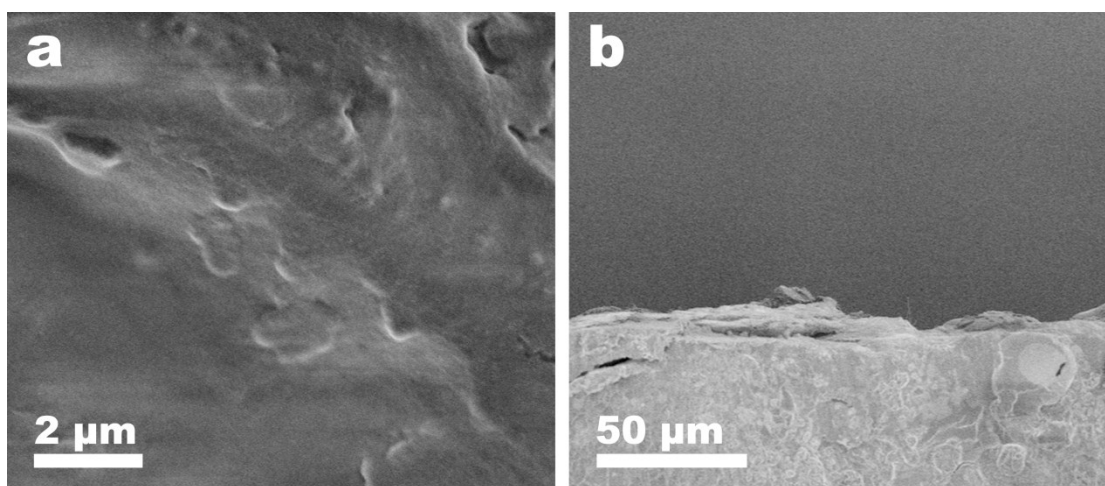

**Fig. S7** (a) Surface and (b) cross section SEM images of the Mg anode after 500 cycles.

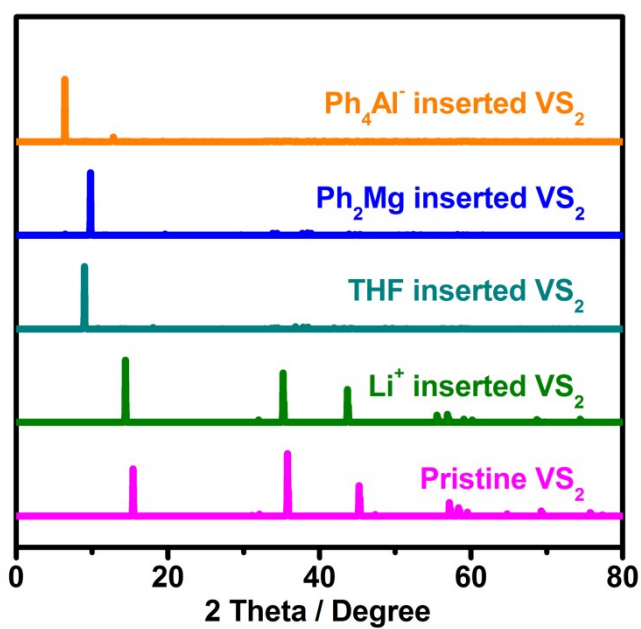

**Fig. S8** Simulated XRD patterns of pristine  $\text{VS}_2$  and  $\text{Li}^+$ , THF,  $\text{Ph}_2\text{Mg}$  and  $\text{Ph}_4\text{Al}^-$  inserted  $\text{VS}_2$ .

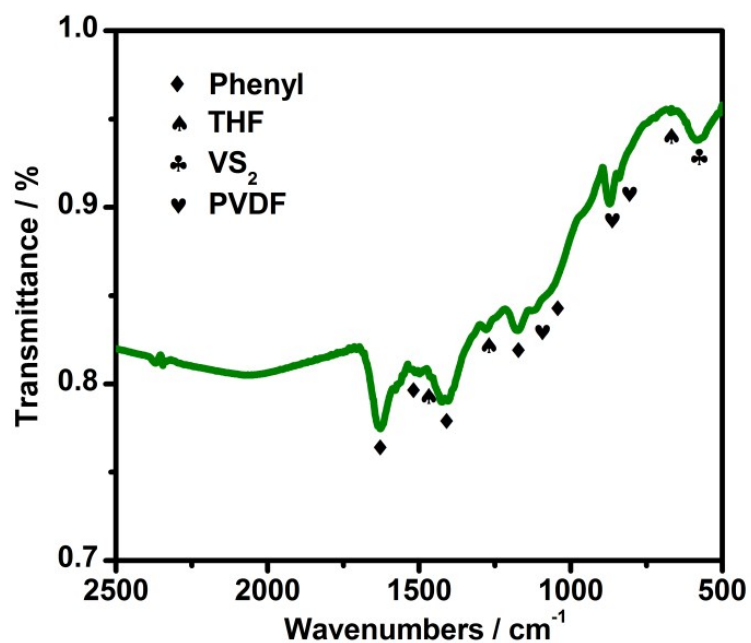

**Fig. S9** FTIR pattern of the  $\text{VS}_2$  nanosheets in LMIB collected after the first charge.

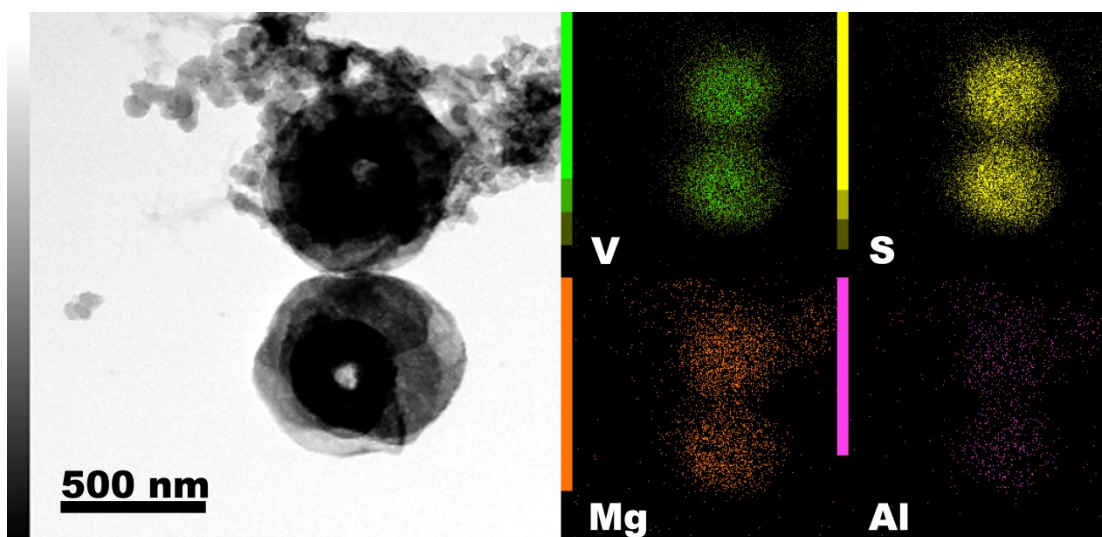

**Fig. S10** V, S, Mg and Al elemental mappings of the charged  $\text{VS}_2$  electrode in LMIB.

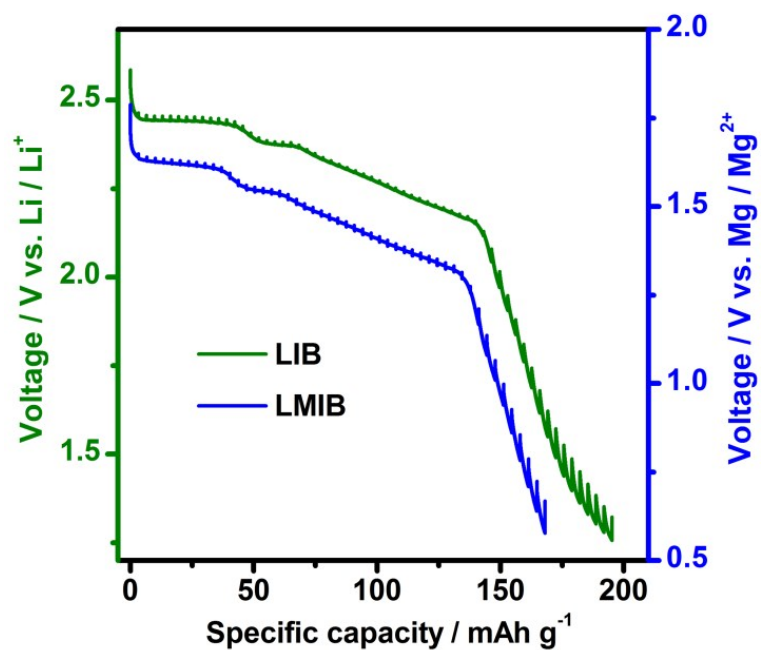

**Fig. S11** GITT curves of the VS<sub>2</sub> nanosheets in LIB and LMIB cells during discharge process.
